# Supplementary material for: Metallic CrP2 monolayer: potential applications in energy storage and conversion
Source: Royal Society of Chemistry journal article supplement (doi:10.1039/d3cp02917d), 2023-01-01
Supplement: d3cp02917d1.pdf [file d3cp02917d1.pdf]

## Supporting Information

### Metallic CrP<sub>2</sub> Monolayer: Potential Applications in Energy Storage and Conversion

Jiayu Gao, Wenyuan Zhang, Xu Yan, Xiaohua Zhang, Sheng Wang, and Guochun Yang\*

*State Key Laboratory of Metastable Materials Science & Technology and Key Laboratory for Microstructural Material Physics of Hebei Province, School of Science, Yanshan University, Qinhuangdao 066004, China*

| Index                                                                                                              | Page |
|--------------------------------------------------------------------------------------------------------------------|------|
| 1. Computational details .....                                                                                     | 2    |
| 2. The phonon dispersion curves of TMP <sub>2</sub> monolayers.....                                                | 2    |
| 3. The formation energies of TMPs monolayers.....                                                                  | 3    |
| 4. The structures of MnP <sub>2</sub> and NiP <sub>2</sub> monolayers after K adsorption.....                      | 3    |
| 5. Thermal stability of the CrP <sub>2</sub> monolayer .....                                                       | 4    |
| 6. The projected density of states (PDOS) of the CrP <sub>2</sub> monolayer.....                                   | 4    |
| 7. The charge density difference (CDD) of CrP <sub>2</sub> after Li and Na adsorption.....                         | 5    |
| 8. The electron localization function (ELF) maps of CrP <sub>2</sub> after Li, Na and K adsorption.....            | 5    |
| 9. The total density of states (TDOS) of CrP <sub>2</sub> K <sub>2</sub> and CrP <sub>2</sub> K <sub>4</sub> ..... | 6    |
| 10. The charge density difference (CDD) of CrP <sub>2</sub> after H adsorption.....                                | 6    |
| 11. Supporting tables.....                                                                                         | 7    |
| 12. References.....                                                                                                | 8    |

## Computational Details

The local structural relaxations and electronic properties calculations were performed in the framework of the density functional theory (DFT) within the generalized gradient approximation (GGA) as implemented in the VASP code.<sup>1</sup> The  $3d^54s^1$  and  $3s^23p^3$  atomic orbitals were treated as valence states for Cr and P, respectively. The cut-off energy for the expansion of wave functions into plane waves was set to 500 eV in the calculations.

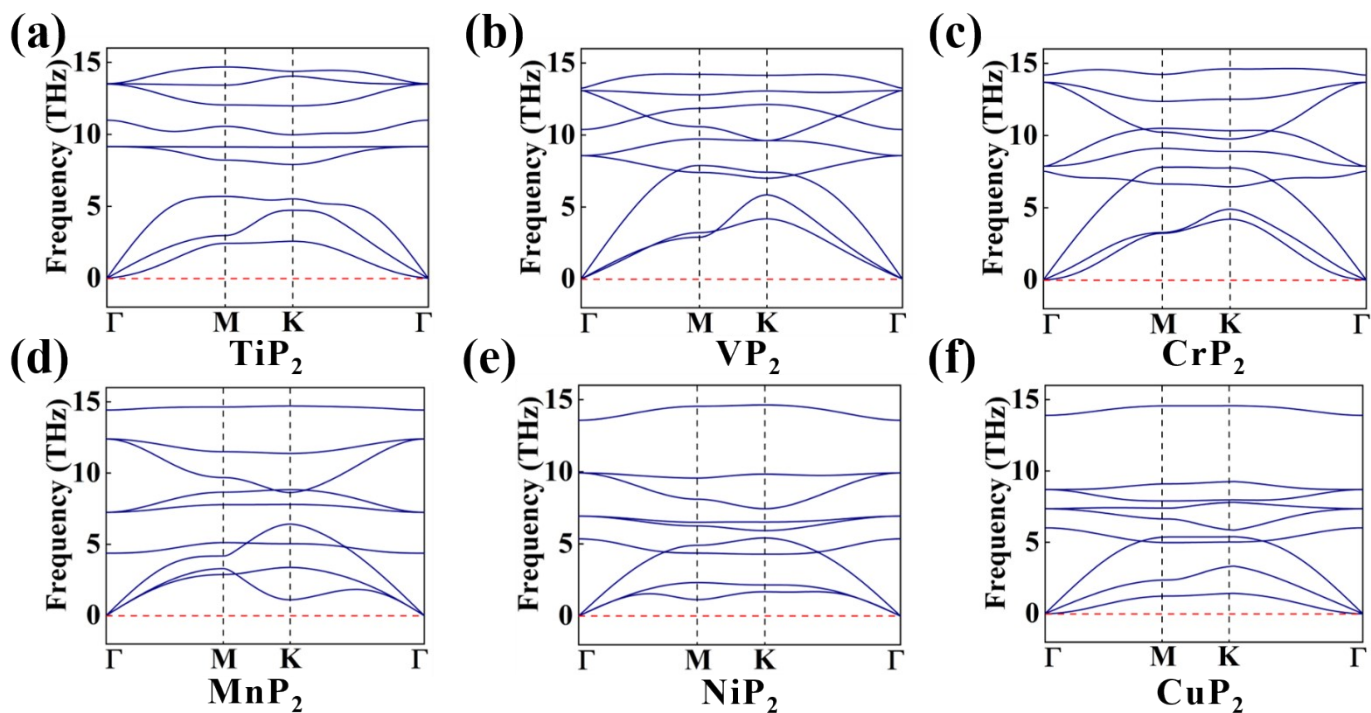

**Figure S1.** The calculated phonon dispersion curves of  $\text{TiP}_2$ ,  $\text{VP}_2$ ,  $\text{CrP}_2$ ,  $\text{MnP}_2$ ,  $\text{NiP}_2$ , and  $\text{CuP}_2$  monolayers.

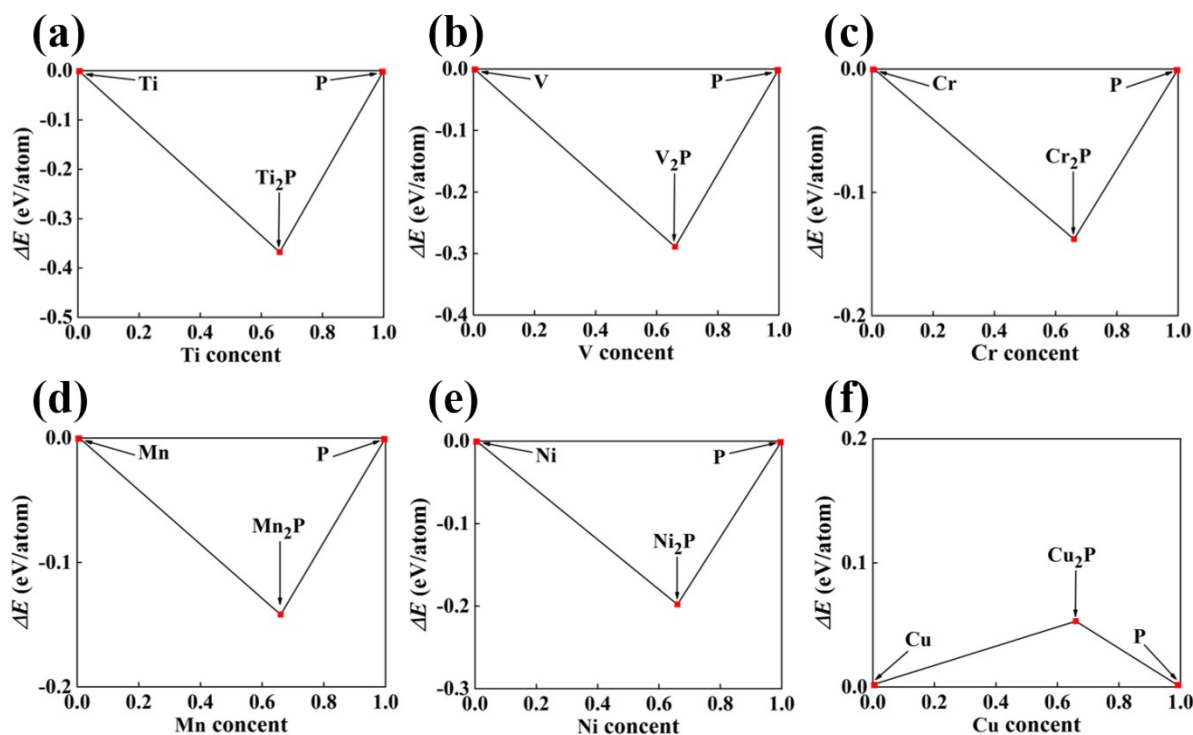

**Figure S2.** The formation energies of TMPs monolayers with respect to the transition metal solids and black phosphorus (*Cmca*).<sup>2</sup> The transition metal solids and their space groups are Ti (*P6<sub>3</sub>/mmc*),<sup>3</sup> V (*Im-3m*),<sup>4</sup> Cr (*Im-3m*),<sup>5</sup> Mn (*I-43m*),<sup>6</sup> Ni (*P6<sub>3</sub>/mmc*)<sup>7</sup> and Cu(*Fm-3m*).<sup>8</sup>

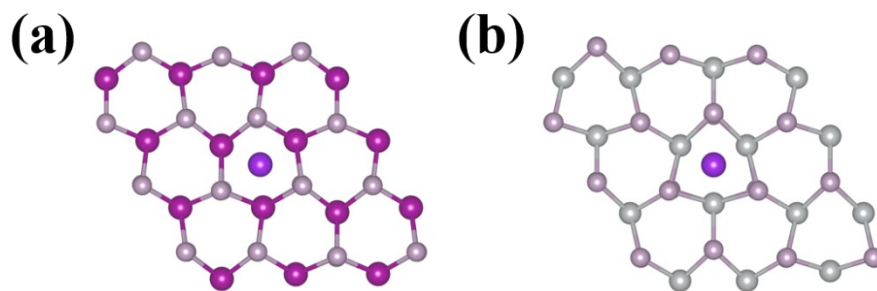

**Figure S3.** The structures of the MnP<sub>2</sub> (a) and NiP<sub>2</sub> (b) monolayers after K adsorption.

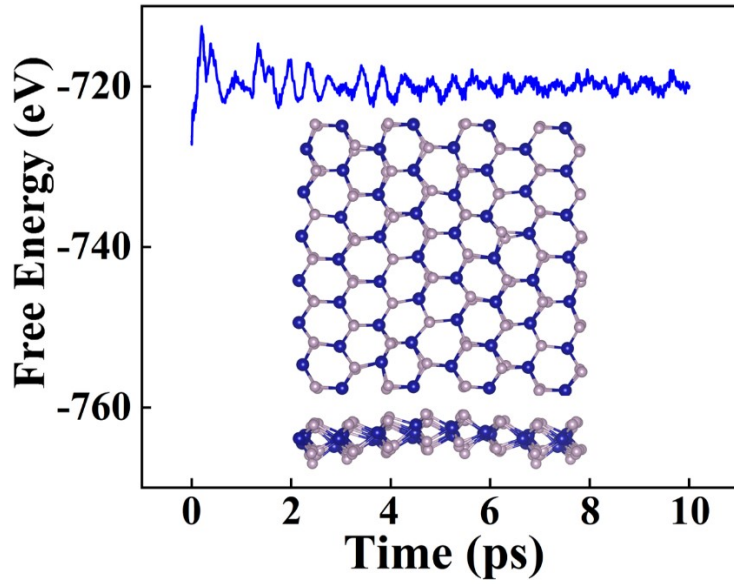

**Figure S4.** First-principles molecular dynamics (MD) simulations were performed at a temperature of 500 K with the free energy variation and final structure of the CrP<sub>2</sub> monolayer within a duration of 10 ps.

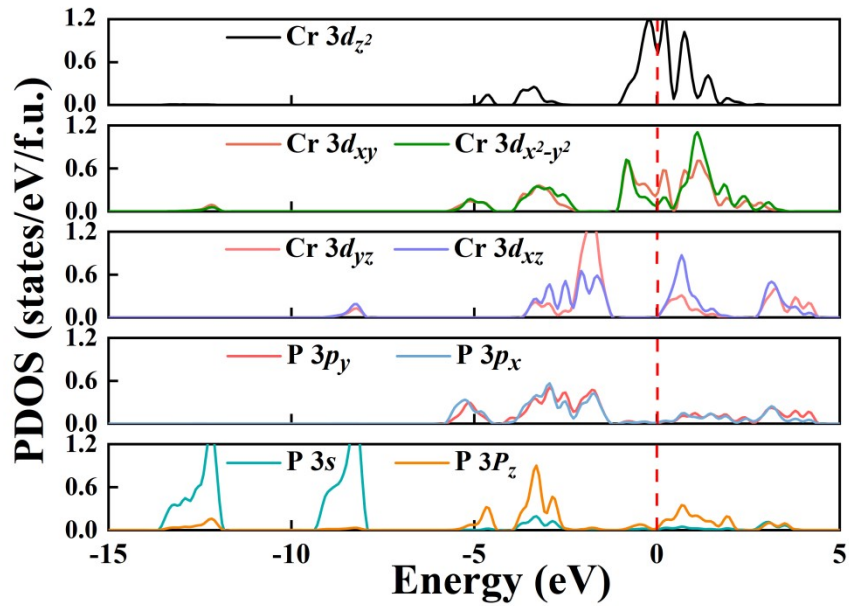

**Figure S5.** Projected density of states (PDOS) of the CrP<sub>2</sub> monolayer.

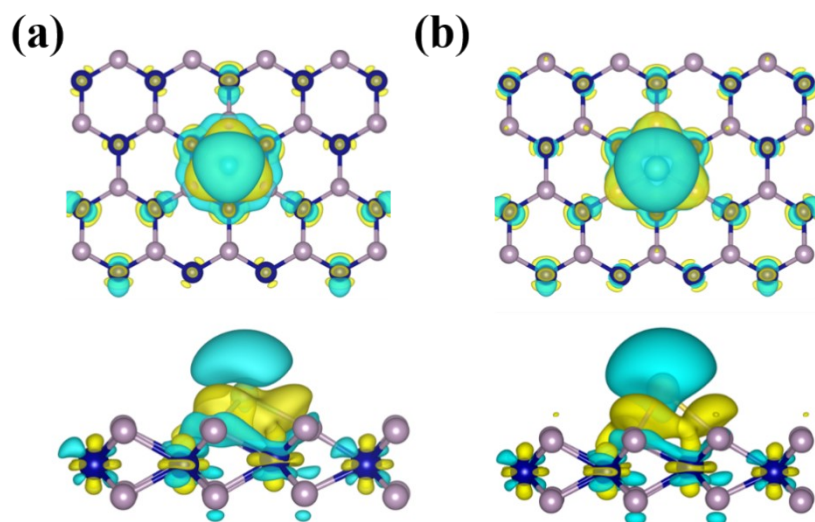

**Figure S6.** The top and side views of charge density difference (CDD) when a Li (a) and Na (b) are adsorbed on the CrP<sub>2</sub> monolayer.

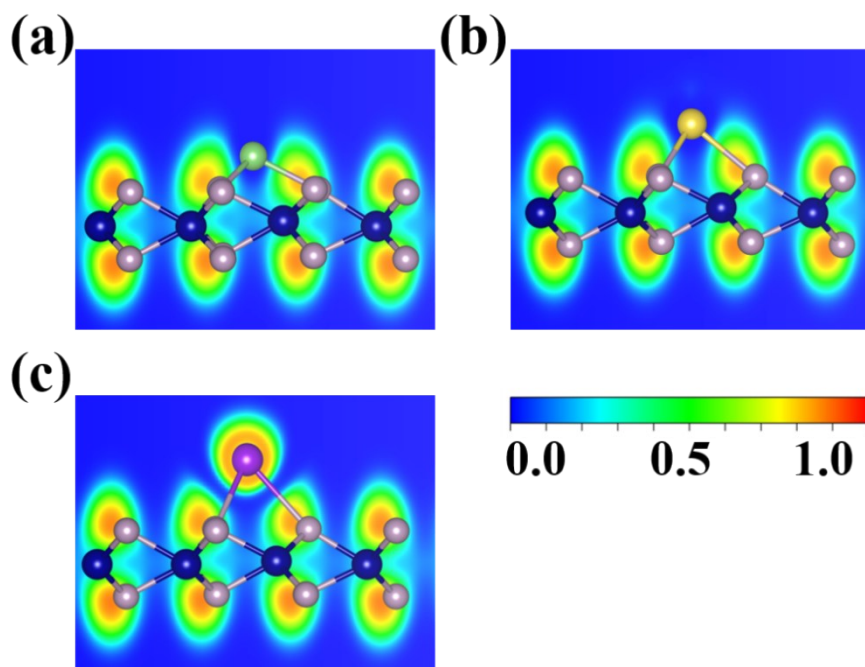

**Figure S7.** The electron localization function (ELF) maps when a Li (a), Na (b) and K(c) are adsorbed on the CrP<sub>2</sub> monolayer.

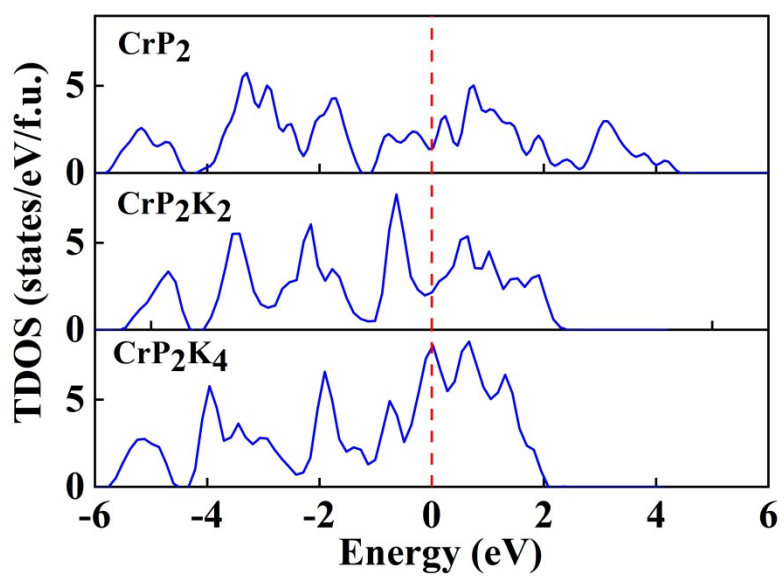

**Figure S8.** Total density of states (TDOS) of  $\text{CrP}_2\text{K}_2$  and  $\text{CrP}_2\text{K}_4$ .

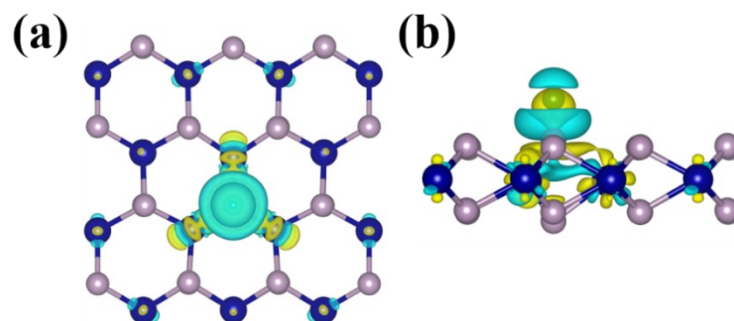

**Figure S9.** The top (a) and side (b) views of charge density difference (CDD) when H adsorbed on the  $\text{CrP}_2$  monolayer.

**Table S1.** Structural information of the  $\text{CrP}_2$  monolayer.

| Structure        | Space Group  | Lattice                   | Atom positions |          |          |         |
|------------------|--------------|---------------------------|----------------|----------|----------|---------|
|                  |              | Parameters<br>(Å, °)      | <i>x</i>       | <i>y</i> | <i>z</i> |         |
| CrP <sub>2</sub> | <i>P-6m2</i> | $a = b = 3.4764$          | Cr             | 0.33333  | 0.66667  | 0.50000 |
|                  |              | $c = 20.0000$             | P              | 0.00000  | 0.00000  | 0.42707 |
|                  |              | $\alpha = \beta = 90.000$ | P              | 0.00000  | 0.00000  | 0.57293 |
|                  |              | $\gamma = 120.000$        |                |          |          |         |

**Table S2.** The adsorption energies (eV) of Li, Na, and K atoms on the TiP<sub>2</sub>, VP<sub>2</sub> and CrP<sub>2</sub> monolayers.

| Structures       | Li     | Na     | K      |
|------------------|--------|--------|--------|
| TiP <sub>2</sub> | -0.909 | -0.626 | -0.919 |
| VP <sub>2</sub>  | -0.644 | -0.390 | -0.731 |
| CrP <sub>2</sub> | -1.105 | -0.878 | -1.204 |

**Table S3.** Elastic constants of the CrP<sub>2</sub> monolayers (in N/m).

| Structure        | C <sub>11</sub> | C <sub>12</sub> | C <sub>22</sub> | C <sub>66</sub> |
|------------------|-----------------|-----------------|-----------------|-----------------|
| CrP <sub>2</sub> | 76.96           | 43.18           | 76.96           | 16.89           |

Based on the Born-Huang criterion:  $C_{11}C_{22} - C_{12}^2 > 0$  and  $C_{66} > 0$ , the CrP<sub>2</sub> monolayer is mechanically stable.<sup>9</sup>

**Table S4.** Relative energies among different magnetic ground states of the CrP<sub>2</sub> monolayer.

| Magnetic ground states | AFM | FM    | FIM   |
|------------------------|-----|-------|-------|
| Relative energies (eV) | 0   | 0.063 | 0.234 |

**Table S5.** The distances between the metal atoms (Li, Na, and K) and the CrP<sub>2</sub> monolayer, and atomic radius of the three considered metal atoms.

| Metal atoms | Distance (Å) | Atomic radius (pm) |
|-------------|--------------|--------------------|
| Li          | 1.18         | 152                |
| Na          | 1.75         | 186                |
| K           | 2.32         | 232                |

**Table S6.** The Mulliken charge and Lowdin charge of single atom (Li, Na, and K) adsorbed on the CrP<sub>2</sub> monolayer.

| Metal atoms | Mulliken charge (e <sup>-</sup> ) | Lowdin charge (e <sup>-</sup> ) |
|-------------|-----------------------------------|---------------------------------|
| Li          | 1.00                              | 0.75                            |
| Na          | 0.87                              | 0.70                            |
| K           | 0.98                              | 0.87                            |

## References

- 1 N. A. W. Holzwarth, A. R. Tackett and G. E. Matthews, *Comput. Phys. Commun.*, 2001, **135**, 329-347.
- 2 R. S. Brown A, *Acta Crystallogr. B*, 1965, **19**, 684-685.
- 3 R. M. Wood, *Proc. Phys. Soc.*, 1962, **80**, 783.
- 4 S. A. Bradford, and O. N. Carlson, *Trans. Am. Soc. Met.*, 1962, **55**, 169-172.
- 5 A. W. Hull and W. P. Davey, *Phys. Rev.*, 1919, **14**, 540-540.
- 6 J. A. Oberteuffer and J. A. Ibers, *Acta Crystallogr. B*, 1970, **26**, 1499-1504.
- 7 H. P. Weik H, *Bull. Am. Phys. Soc.*, 1965, **10**, 1140.
- 8 H. M. Otte, *J. Appl. Phys.*, 2004, **32**, 1536-1546.
- 9 M. B. Kanoun, S. Goumri-Said and M. Jaouen, *Phys. Rev. B*, 2007, **76**, 134109.
